# Supplementary material
Source: publisher figshare collection journal article supplement (https://acs.figshare.com/ndownloader/files/5458688)
Supplement: Supplementary file 1 [file 5458688]

## **Confronting Neutrality: Maximizing Success in the Analysis of Transition-Metal Catalysts by MALDI Mass Spectrometry**

Gwendolyn A. Bailey and Deryn E. Fogg\*

*Centre for Catalysis Research & Innovation, Department of Chemistry and Biomolecular Sciences, University of Ottawa, Ottawa, Ontario, Canada K1N 6N5*

\*Corresponding author. Email: [dfogg@uottawa.ca](mailto:dfogg@uottawa.ca)

### **Table of Contents**

|                                                                                      |    |
|--------------------------------------------------------------------------------------|----|
| S1. Spectrometers and experimental parameters used.....                              | S2 |
| S2. Additional examples showing impact of matrix $\epsilon_M$ on fragmentation. .... | S3 |
| S3. Spectra showing aggressive decomposition by functionalized matrices.....         | S4 |
| S4. Spectra showing impact of laser beam profile on fragmentation. ....              | S5 |
| S5. UV-Vis spectra of selected matrices and analytes.....                            | S6 |

## S1. Spectrometers and experimental parameters used.

**Table S1.** MALDI mass spectrometers used, and relevant instrument parameters.

| Instrument                         | Location                                                                                    | Laser            |            | Figure                    |
|------------------------------------|---------------------------------------------------------------------------------------------|------------------|------------|---------------------------|
|                                    |                                                                                             | Type             | Wavelength |                           |
| AB Sciex 5800 TOF/TOF              | MALDI MS / Functional Proteomics Facility, London Regional Proteomics Centre, Western Univ. | Nd:YLF           | 349 nm     | 3, S3a                    |
| AB Sciex 5800 TOF/TOF              | AB Sciex Framingham, MA                                                                     | Nd:YLF           | 349 nm     | 5e                        |
| Applied Biosystems 4700 TOF/TOF    | MALDI MS / Functional Proteomics Facility, London Regional Proteomics Centre, Western Univ. | Nd:YAG           | 355 nm     | S4a <sup>a</sup>          |
| Applied Biosystems 4800 TOF/TOF    | Univ. Toronto Forestry Dept.                                                                | Nd:YAG           | 355 nm     | 2, 6, 9a                  |
| Bruker Microflex TOF               | Bruker Daltonics Billerica MA                                                               | N <sub>2</sub>   | 337 nm     | S3c                       |
| Bruker Omnimflex TOF               | Fogg Anaerobic MALDI-MS Facility, Univ. Ottawa                                              | N <sub>2</sub>   | 337 nm     | S3c                       |
| Bruker Reflex IV TOF               | MALDI MS / Functional Proteomics Facility London Regional Proteomics Centre, Western Univ.  | N <sub>2</sub>   | 337 nm     | S4b <sup>a</sup>          |
| Bruker Ultraflex II TOF/TOF        | Bruker Daltonics Billerica, MA                                                              | N <sub>2</sub>   | 337 nm     | 9b                        |
| Bruker UltrafleXtreme TOF/TOF      | Bruker Daltonics Billerica, MA                                                              | contoured Nd:YAG | 355 nm     | 1, 4, 5a-d, 7, 9c, S1, S2 |
| Shimadzu Performance TOF/TOF       | Shimadzu Columbia MD                                                                        | N <sub>2</sub>   | 337 nm     | S3c                       |
| ThermoFisher MALDI LTQ Orbitrap XL | Laboratory of Imaging Mass Spectrometry Univ. North Texas                                   | N <sub>2</sub>   | 337 nm     | 8                         |
| Waters Micro MX TOF                | Advanced Instrumental Mass Spectrometry Lab Univ. Toronto                                   | N <sub>2</sub>   | 337 nm     | S3c                       |
| Waters Synapt G2-Si MALDI-QTOF     | Waters Corp. Milford MA                                                                     | Nd:YAG           | 355 nm     | S3b                       |

<sup>a</sup> At the time of use, these lasers were near the end of their operational lifetimes, and higher applied laser energies were therefore required. The impact on fragmentation is illustrated in Fig. S4.

## S2. Additional examples showing impact of matrix $\epsilon_M$ on fragmentation.

These spectra supplement the two extremes shown in Figure 4.

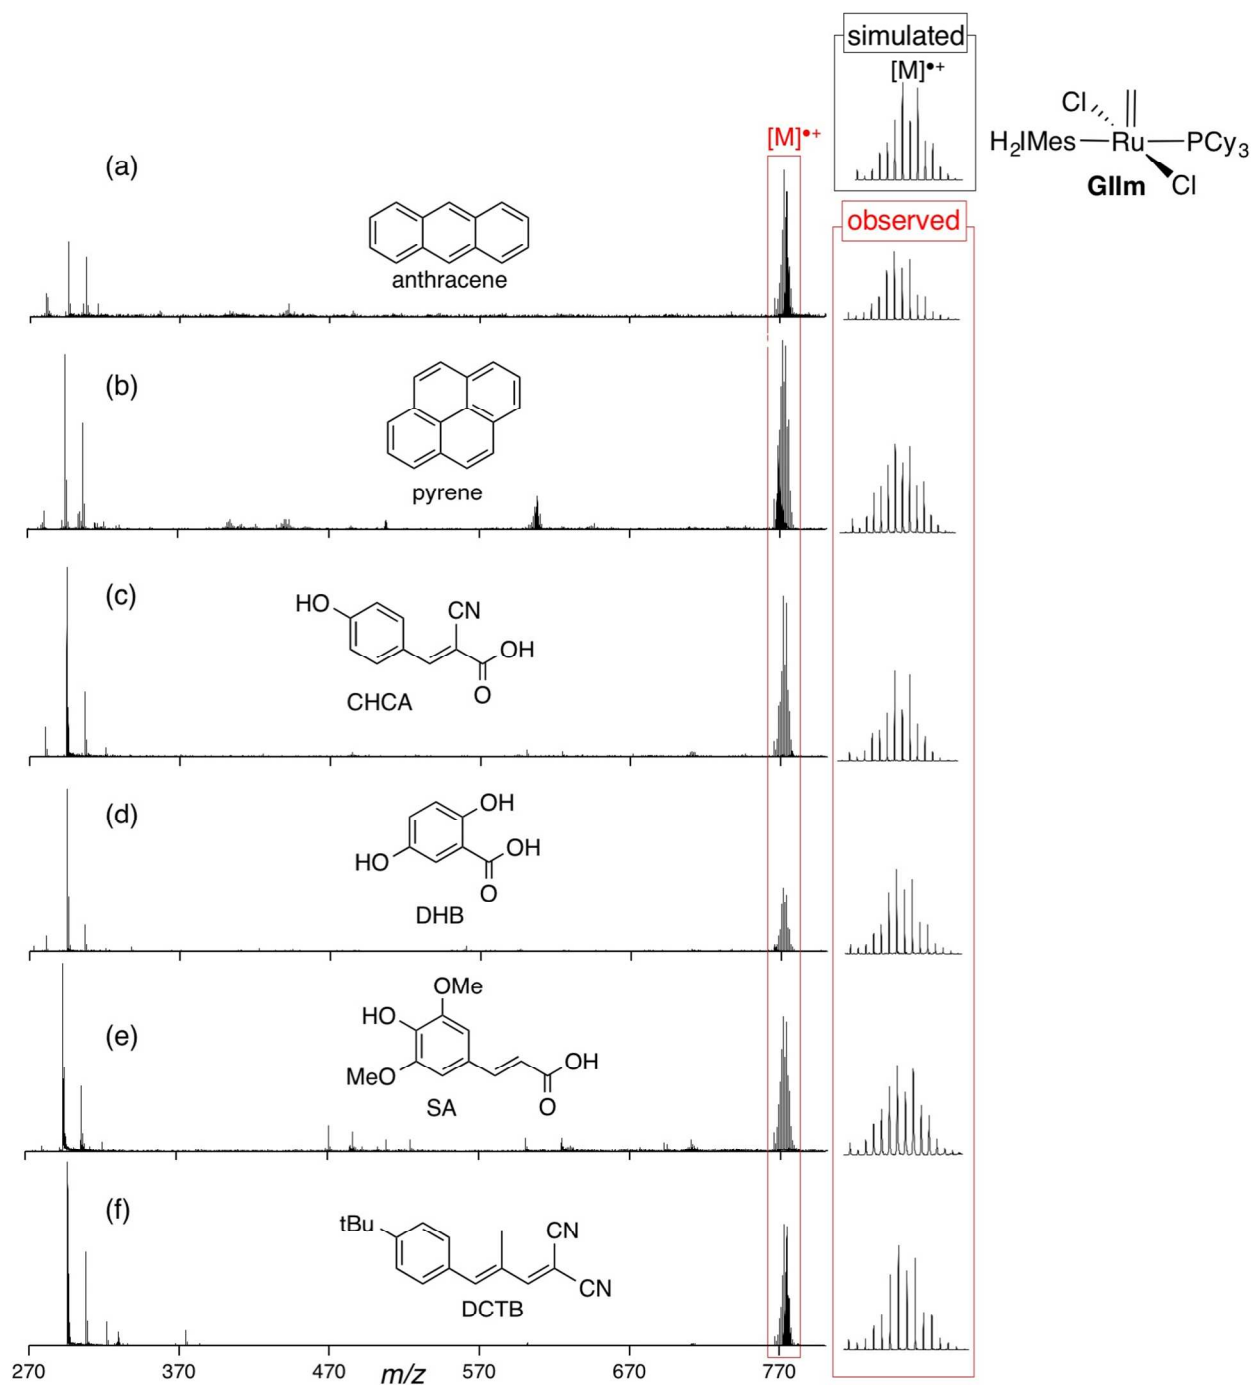

**Figure S1.** Impact of matrix  $\epsilon_M$  on fragmentation, assessed in analysis of non-labile **GIIIm**. MALDI mass spectra of **GIIIm** with (a) anthracene; (b) pyrene; (c) CHCA; (d) DHB; (e) SA; (f) DCTB.

### S3. Spectra showing aggressive decomposition by functionalized matrices.

These examples supplement the spectra shown in Figure 5, which focus on more widely-used matrices.

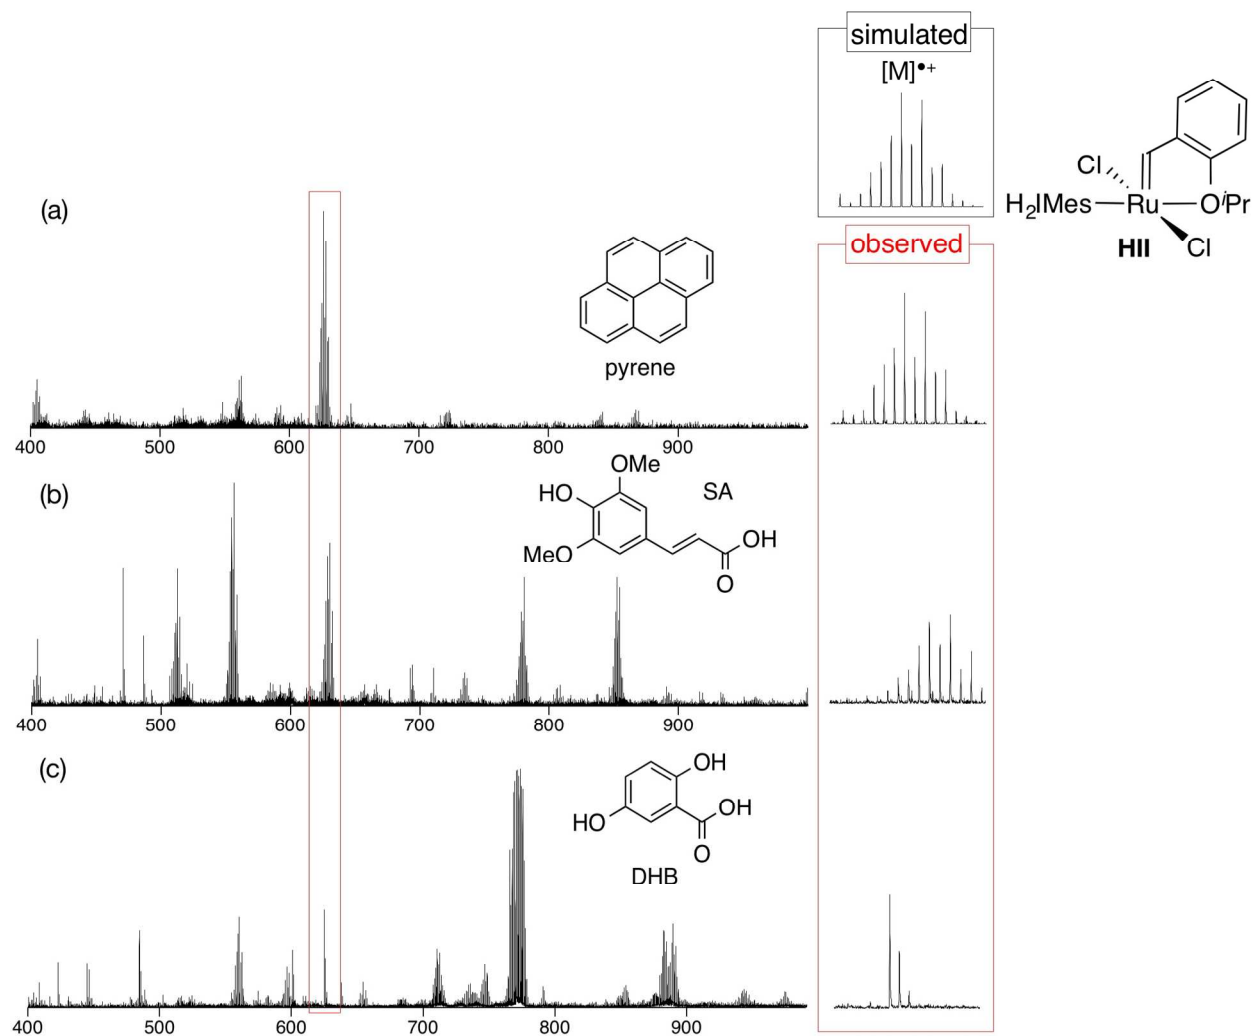

**Figure S2.** MALDI mass spectra showing gas-phase decomposition of **HIII** by functionalized matrices, as compared to the benchmark pyrene. (a) Pyrene; (b) SA; (c) DHB.

#### S4. Spectra showing impact of laser beam profile on fragmentation.

These examples supplement the spectra shown in Figure 9 (which were drawn from instruments matched as closely as possible, to facilitate comparison).

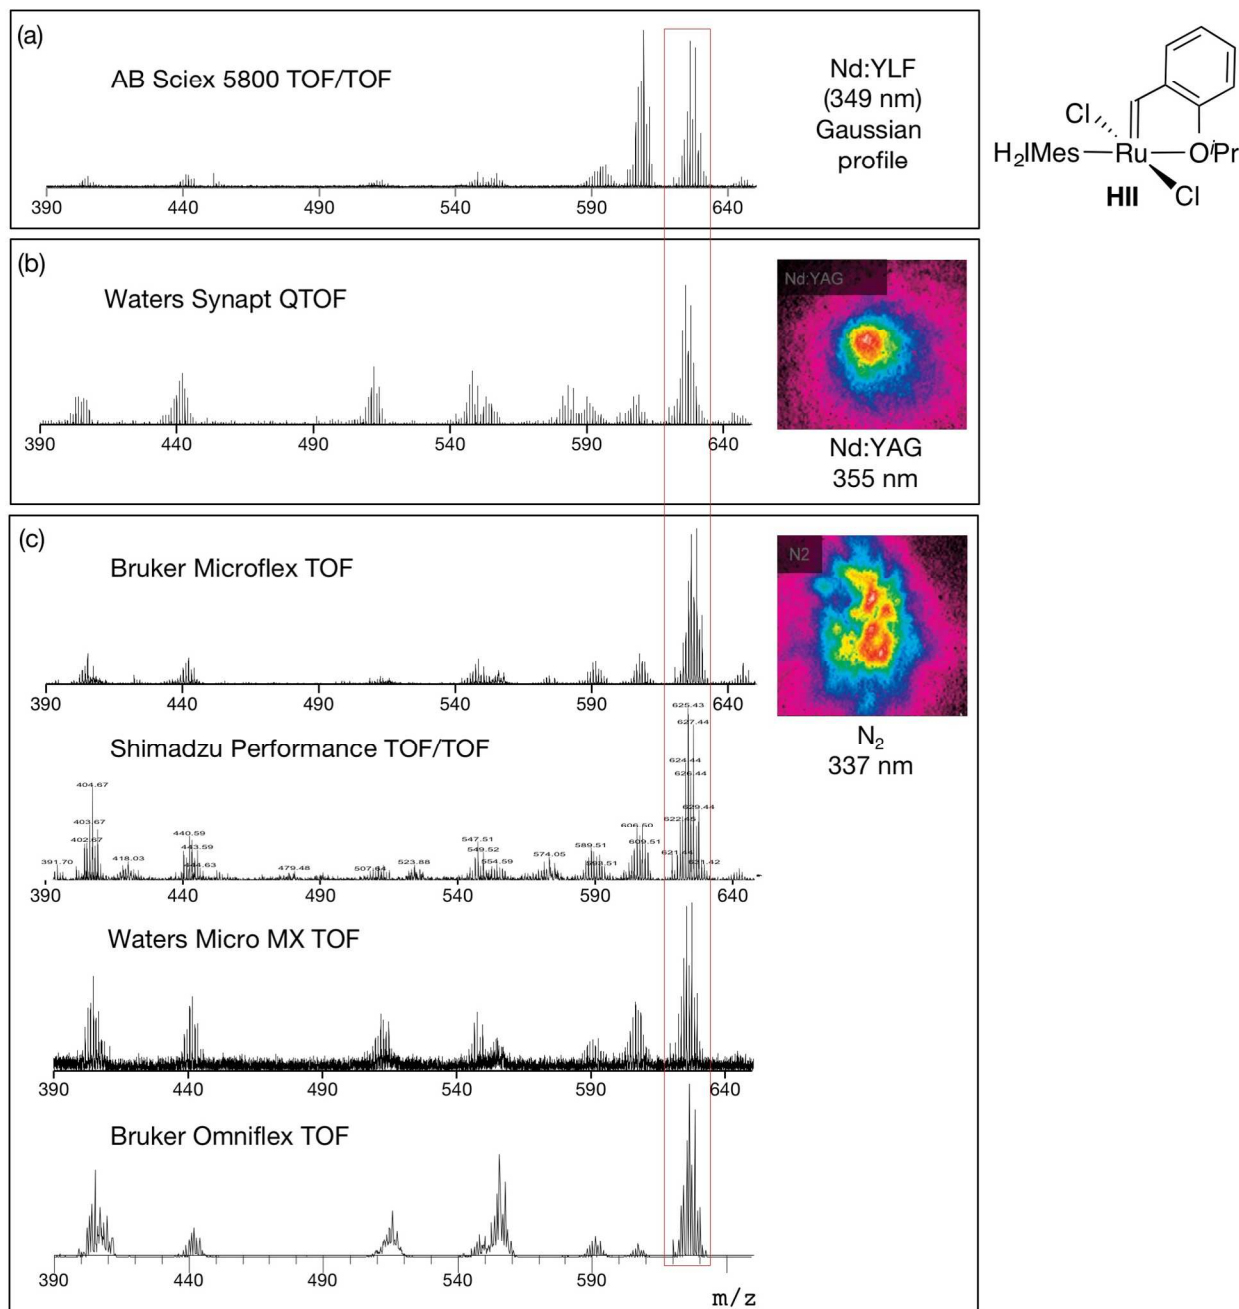

**Figure S3.** Impact of laser beam profile on fragmentation of **HII**. Spectra recorded using (a) a Nd:YLF laser; (b) a Nd:YAG laser; and (c) a N<sub>2</sub> laser.

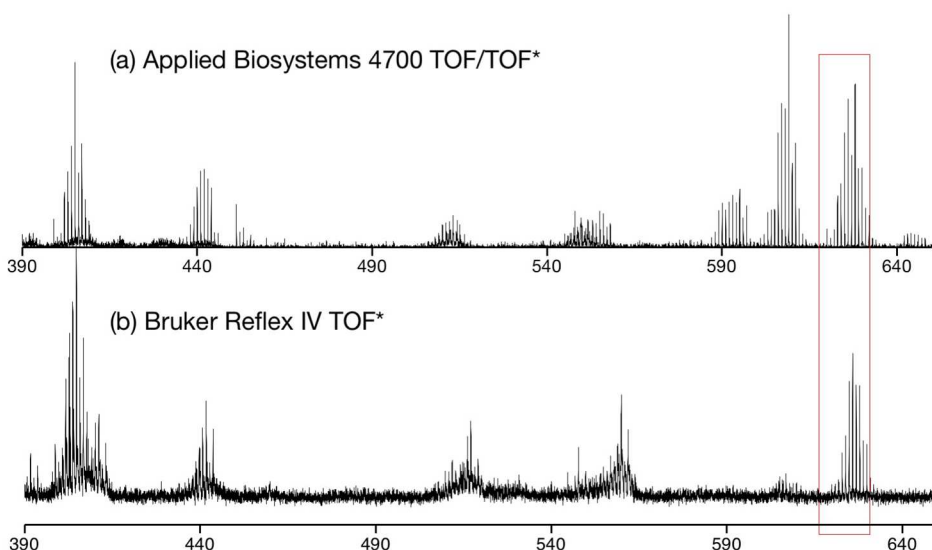

**Figure S4.** Negative impact of laser age on performance. MALDI mass spectra recorded for **HII** on (a) Nd:YAG (Applied Biosystems 4700) and (b) N<sub>2</sub> (Bruker Reflex II) lasers that were nearing the end of their lifetime, necessitating use of higher applied laser energies.

#### S5. UV-vis spectra of selected matrices and analytes.

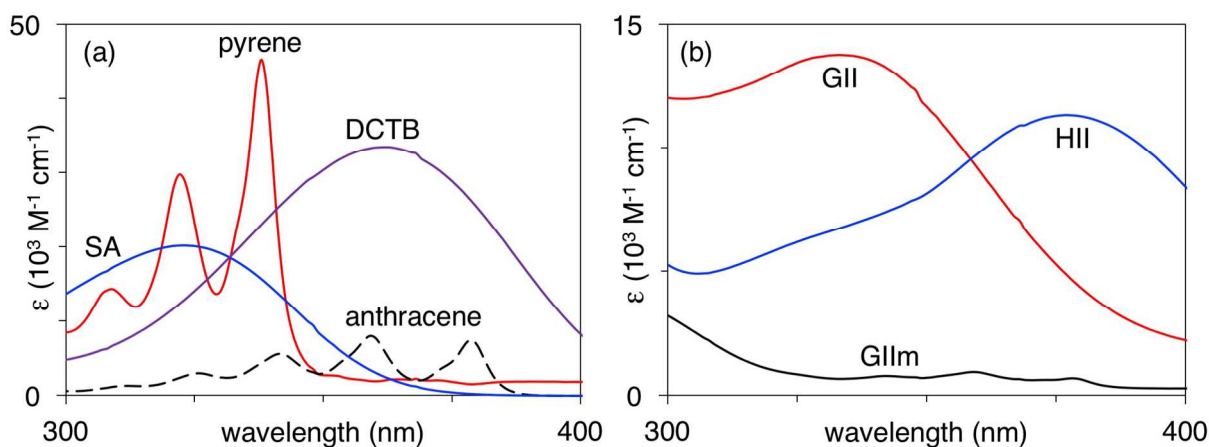

**Figure S5.** (a) UV-vis spectra of the matrices pyrene, anthracene, and DCTB in CH<sub>2</sub>Cl<sub>2</sub>; spectrum of SA (which is very poorly soluble in CH<sub>2</sub>Cl<sub>2</sub>) in methanol. (b) UV-vis spectra of the analytes **GII**, **GIIm**, and **HII** in CH<sub>2</sub>Cl<sub>2</sub>.
